# Supplementary material for: Rickettsia Infection Benefits Its Whitefly Hosts by Manipulating Their Nutrition and Defense
Source: MDPI journal article supplement (doi:10.3390/insects13121161), 2022-12-15
Supplement: s1 [file s1]

## Supplement

**Table S1.** Analysis of variance (ANOVA) on the effects of different concentrations of *Akanthomyces attenuatus* and *Rickettsia* infection on the mortality of whitefly.

| Age | Source                                   | Df | F      | p       |
|-----|------------------------------------------|----|--------|---------|
| 1st | Concentration                            | 4  | 87.47  | <0.0001 |
|     | <i>Rickettsia</i>                        | 1  | 120.33 | <0.0001 |
|     | Concentration $\times$ <i>Rickettsia</i> | 4  | 3.86   | 0.0176  |
| 2nd | Concentration                            | 4  | 312.21 | <0.0001 |
|     | <i>Rickettsia</i>                        | 1  | 23.77  | <0.0001 |
|     | Concentration $\times$ <i>Rickettsia</i> | 4  | 9.06   | 0.0002  |
| 3rd | Concentration                            | 4  | 126.43 | <0.0001 |
|     | <i>Rickettsia</i>                        | 1  | 41.95  | <0.0001 |
|     | Concentration $\times$ <i>Rickettsia</i> | 4  | 14.19  | <0.0001 |
| 4th | Concentration                            | 4  | 67.24  | <0.0001 |
|     | <i>Rickettsia</i>                        | 1  | 26.77  | <0.0001 |
|     | Concentration $\times$ <i>Rickettsia</i> | 4  | 7.92   | 0.0005  |

**Table S2.** Analysis of variance (ANOVA) on the effects of different concentrations of insecticide and *Rickettsia* infection on the mortality of whitefly.

| Insecticide   | Age   | Source                                   | Df | F      | p       |
|---------------|-------|------------------------------------------|----|--------|---------|
| Imidacloprid  | 2nd   | Concentration                            | 6  | 113.77 | <0.0001 |
|               |       | <i>Rickettsia</i>                        | 1  | 3.74   | 0.063   |
|               |       | Concentration $\times$ <i>Rickettsia</i> | 6  | 0.83   | 0.059   |
|               | adult | Concentration                            | 6  | 74.72  | <0.0001 |
|               |       | <i>Rickettsia</i>                        | 1  | 6.05   | 0.02    |
|               |       | Concentration $\times$ <i>Rickettsia</i> | 6  | 1.58   | 0.19    |
| Spirotetramat | 2nd   | Concentration                            | 6  | 220.59 | <0.0001 |
|               |       | <i>Rickettsia</i>                        | 1  | 37.97  | <0.0001 |
|               |       | Concentration $\times$ <i>Rickettsia</i> | 6  | 2.98   | 0.022   |
|               | adult | Concentration                            | 6  | 43.41  | <0.0001 |
|               |       | <i>Rickettsia</i>                        | 1  | 4.06   | 0.054   |
|               |       | Concentration $\times$ <i>Rickettsia</i> | 6  | 0.66   | 0.68    |
